# Supplementary material for: Growth Performance, Carcass Characteristics and Economic Viability of Nguni Cattle Fed Diets Containing Graded Levels of <em>Opuntia ficus-indica</em>
Source: Preprints.org preprint supplement (doi:10.20944/preprints202205.0394.v1), 2022-05-30
Supplement: Supplementary file 1 [file supplementary]

## Supplemental material Agriculture

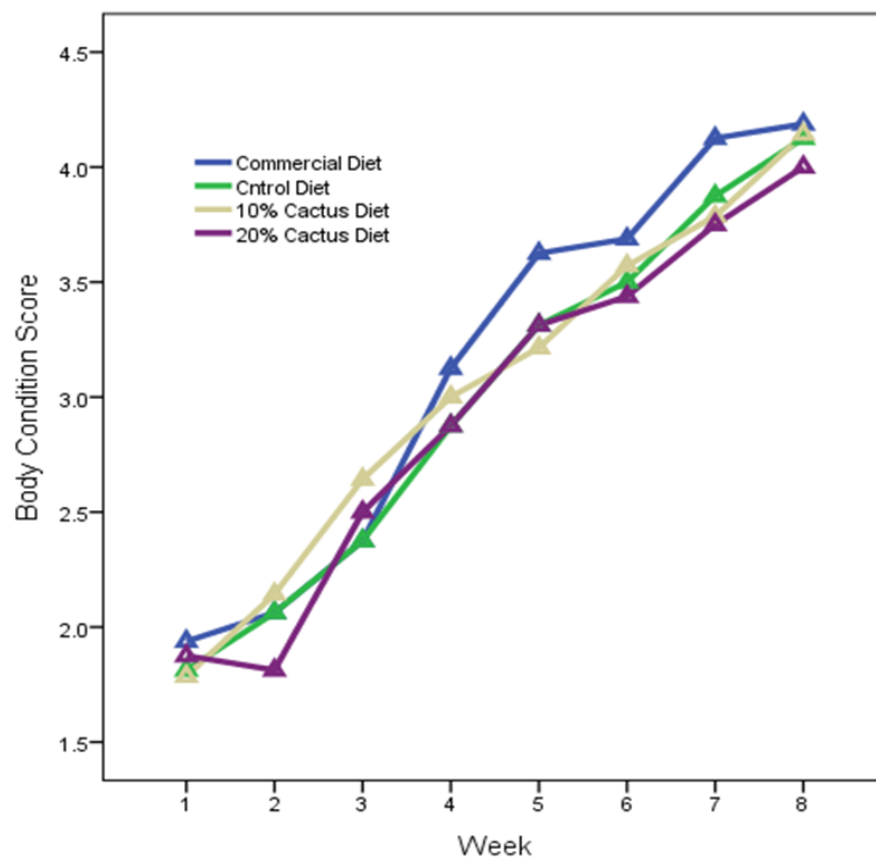

**Figure 1:** Body condition score over time of cattle fed cactus and non-cactus diets
